# Supplementary material
Source: Elsevier journal article supplement (https://www.sciencedirect.com/science/article/pii/S2530064420300407)
Supplement: mmc4 [file S2530064420300407:mmc4.docx]

18 9 291 3

GS2

GS3

GS4

GS5

GS10

GS12

GS13

GS14

GS15

1 194194 180184 197199 269275 187215 212212 195197 201205 236236

1 194196 186186 195195 275275 187215 234236 195195 201201 236238

1 196196 180184 195195 275275 187215 200222 195195 201201 238238

1 196196 180188 195195 269269 187215 212214 195195 201205 238238

1 194196 180184 195195 269275 187215 200210 193197 201201 236238

1 196196 180188 197199 275275 187215 206206 195199 201201 238238

1 196196 176178 197199 269275 187215 200210 195197 201201 238240

1 196196 178188 195195 275275 187215 202212 195195 201205 238238

1 194196 178184 195197 269275 187215 212214 197197 201201 236238

1 194196 180180 195195 269275 187215 212214 195195 201205 236238

2 196196 176186 195195 269269 187215 198214 195195 201201 238240

2 196196 178182 195195 269275 187187 202202 195195 201201 238238

2 196196 180182 195197 269275 187215 206206 000000 201205 238238

2 196196 178188 195195 269269 215215 214214 195195 201201 238238

2 196196 182188 195195 269275 187215 206206 195195 201205 238238

2 196196 178182 195195 269275 187215 196204 195195 201201 238238

2 196196 176184 195195 269275 215215 216216 195195 201205 238238

2 194196 184184 195195 269275 187215 218236 195195 201201 236238

2 194196 182186 195195 269275 187215 206210 195195 201209 236238

2 196196 176184 195195 269275 187215 198198 195195 201205 238238

2 200200 172200 195195 000000 000000 192192 195195 201201 242242

2 196196 180182 195195 269275 187215 204208 195195 201201 238238

2 196196 174186 195195 269275 187215 198204 195195 201205 238238

2 196196 178178 195195 269269 187215 204206 195195 201205 238238

2 196196 176182 195195 269269 187215 210210 195195 201205 238238

2 196196 164186 195197 269269 187215 206206 197197 201205 238238

2 000000 174190 195195 00 187215 206206 195201 201201 238238

2 196198 186192 195197 269275 187215 220220 195195 201201 238238

2 196198 178184 195195 269269 187215 200214 195195 201201 238238

2 196196 184184 195195 00 187215 200200 195195 201205 238238

2 196196 178184 195199 269275 187215 192206 195199 205205 238238

2 196200 170186 195195 00 215215 206206 195195 205205 238242

2 198198 184190 195197 00 215215 238238 195195 201201 238238

3 196196 178188 197197 269275 187215 200204 197197 201201 238238

3 196198 186194 195195 269275 187215 206206 195195 201205 238240

3 200200 154154 195195 00 00 190190 195195 201201 242242

3 200200 178182 195195 00 215215 194194 195195 201201 240240

3 196196 182184 195195 269275 187215 198204 195197 201205 238238

3 196198 176180 195195 269269 187215 212212 195195 201201 238240

3 196196 174184 195197 269275 187215 214216 195197 201201 238238

3 194198 182188 195195 275275 187215 202206 195195 201201 236240

3 196196 160160 197197 269275 187215 228228 197197 201205 238238

3 192196 178182 195195 269275 187215 200202 195195 201201 234238

4 192196 178182 195195 269275 187215 202206 195195 201201 234238

4 196196 172186 197197 269275 187215 202210 197197 201201 238238

4 194196 172176 195195 269269 215215 204214 195195 201201 236238

4 196196 182184 195197 269269 187215 200216 197197 201205 236236

4 196196 182200 199201 00 187187 236236 195197 201201 238238

4 194196 180188 195195 269269 187215 206218 195195 201201 236238

4 196196 184184 195197 269275 187215 204206 195197 201201 238238

4 196196 176200 195195 275275 187215 210216 195195 201201 238238

4 198198 184186 195195 275275 187215 204212 195195 201201 236238

4 198198 178186 195195 269269 187215 218218 195195 201201 240240

4 198198 180186 195197 269275 187215 210210 195197 201201 238238

4 196196 178188 201201 269269 00 202206 195197 201201 238238

4 196196 180184 195195 269275 00 200216 195195 201205 00

4 196196 178180 195195 00 00 212216 195195 201201 238238

5 194194 180184 195197 275275 187215 206218 195197 201201 234234

5 198198 176180 195195 275275 187215 206218 195197 201201 236236

5 198198 178182 193195 269269 187187 190204 195195 201209 236240

5 196198 178186 197197 00 187187 204210 197197 201201 236238

5 198198 182184 195197 00 00 202206 195197 201201 238238

5 196198 164182 195195 00 215215 238238 195195 201201 238238

5 196196 174180 195195 269269 187215 200212 195195 201201 238238

5 194196 182182 195197 269275 187215 236238 197199 201205 238238

5 196196 180186 195197 269269 215215 204206 197199 201201 238238

5 196196 186186 195195 269269 215215 200216 195195 201201 238238

5 194196 186186 195195 275275 187215 204214 197197 201201 238238

5 196196 178178 197197 00 187215 204204 195195 201201 238238

5 194198 176176 195195 269269 187215 200210 195195 201205 238238

5 196196 186186 195195 275275 187215 216236 193193 209209 236236

5 196196 182186 195195 269269 187215 202202 195195 201201 238238

6 196198 176182 197197 00 187187 216218 195197 201201 238240

6 196196 180184 195195 00 219219 236236 195195 201201 238238

6 198198 178182 197197 00 187187 236236 195195 205205 238238

6 198198 158182 197197 00 187187 236236 193193 205205 238238

6 198198 182182 195195 00 215215 236236 195195 201201 232236

6 196196 182182 197197 00 187215 236236 195195 201201 238240

6 198198 176176 197197 275275 215215 216216 195195 201201 238238

6 196196 178182 197197 269275 187215 200210 195195 201201 238238

6 196198 178180 195195 269269 215215 192206 195195 201201 238240

6 194196 184208 195195 269269 215215 198206 195195 201201 236238

7 194196 182184 195195 269275 187187 204206 195195 201201 236238

7 196196 160180 195195 269269 187215 206206 195195 201201 238238

7 194196 178184 197197 269275 187215 198204 193197 201201 238238

7 196198 176178 195197 269269 187215 200210 195195 201201 240242

7 196200 186192 195195 269275 187215 204218 195195 201205 238240

7 196196 178182 195195 269269 187215 216218 195195 201205 238238

7 196196 186192 197197 269275 187215 210210 195195 201201 238238

8 200200 180184 195195 269275 187187 218238 195195 201209 238238

8 196196 184184 195197 275275 187187 236238 195197 201209 238238

8 196196 176182 195195 269275 187187 234238 195195 201209 238238

8 196196 180182 195195 269275 187215 212216 195195 201201 238238

8 196196 176182 179195 269269 187215 202206 195195 201201 238238

8 196196 178188 195195 00 187215 200214 195195 201201 238238

8 196200 178178 195195 269269 187215 206210 195195 201201 238240

8 196196 176184 195195 269275 187215 210210 195195 201201 238238

8 198198 178180 195195 269275 187215 200206 195195 201201 234240

8 196196 182182 197199 269275 187215 204214 195199 201205 238238

9 196196 190194 195197 269275 187215 218238 195197 201201 236238

9 196196 180182 195195 269275 187215 192214 195195 201201 238238

9 196198 182182 195197 269275 187215 236238 195197 201201 238240

9 200200 176186 195195 00 187215 236236 195195 201201 236238

9 00 178184 195197 00 215215 226230 195197 201201 238238

9 196196 180184 195197 275275 187215 236236 195197 201209 238238

9 196196 184196 195195 269275 187215 236236 195195 201201 238238

9 196196 180182 195195 269275 187215 202212 195195 201201 238238

9 194196 178184 195195 275275 187215 236236 195195 201205 236238

9 196196 176176 195197 269269 187215 202206 195197 201201 238238

9 196196 184186 197197 275275 187215 210210 197197 201201 238238

9 196196 176180 195195 269275 187215 200200 195195 201201 238238

9 194196 178186 195195 269275 187215 212212 195195 201201 236238

9 196196 178180 195195 275275 187215 204210 195195 201201 236236

10 196196 182184 193195 269275 187215 200206 197197 201201 238238

10 196196 178182 193195 269275 187215 202212 195195 201209 238238

10 194196 180184 195197 269269 187215 198206 193197 201201 236238

10 194198 180188 195195 269275 187215 206214 195195 201201 236240

10 196196 178182 195197 269275 187215 212216 195197 201201 238238

10 196196 180180 195195 269275 187215 206222 195195 201201 236238

10 194196 182182 195197 269269 187215 214214 199199 201205 236238

10 196196 176182 195195 269275 187215 190190 195195 201205 238238

10 196198 178188 193195 269275 215215 204216 195195 201205 238238

10 196196 188180 193193 269275 187215 202206 193195 201201 238238

10 194196 176180 193195 269275 187187 212220 193193 201201 238238

10 196198 182188 195195 269275 187215 200210 195195 201205 236238

10 192196 186198 195195 269269 187215 202212 195195 201201 234238

10 196198 182182 195195 269269 215215 214216 197197 201205 238240

10 196196 168190 195195 269275 187215 202202 197197 201201 238238

10 196198 176184 195195 275275 00 206206 197197 201201 238240

10 198198 178186 195195 00 00 210214 195195 201201 238238

10 194196 182182 195195 00 00 204204 195195 201205 234234

11 196196 176182 197197 269275 187187 238238 199199 201201 236236

11 192196 176176 195195 269275 187215 206222 195195 201201 236238

11 192194 186186 195195 269275 187215 206210 195195 201205 236236

11 194196 178178 199201 269269 187215 202206 195197 201201 238238

11 194196 184192 195197 269269 187215 202206 195197 201201 238238

11 192194 188188 195195 269269 187215 206206 193195 201201 236236

11 196198 00 195195 00 00 236236 00 00 238238

11 192198 178188 195195 269275 187215 236236 195197 201201 236238

11 196196 176190 195195 269275 187215 216218 197197 201201 238238

11 192196 180182 195197 269275 187215 232236 195197 201201 234238

11 196196 188188 195195 269275 187215 196196 195197 201205 238238

11 196198 180182 193195 269275 187187 204204 193197 201201 238240

11 194198 178178 195195 269275 187187 222222 195197 201201 238240

11 196196 178188 195199 269269 187187 206220 195195 201201 238238

12 196196 178178 195197 00 187215 238238 195199 201201 238238

12 196196 182184 195195 269275 215215 236238 197197 201201 238238

12 196198 182182 195197 269275 187187 236236 195195 201201 238238

12 198198 184184 193195 269269 187215 236238 195197 201201 238238

12 198198 186186 195195 269275 187187 190212 195195 205205 238238

12 198198 176184 195195 269269 187187 206210 195195 201201 238240

12 196198 176176 193193 269275 187215 238238 197197 201201 238240

12 194196 196196 193195 269275 187215 236236 195195 201201 236238

12 198198 174184 195201 269269 187187 236238 195201 201201 236236

13 196196 182182 195195 269269 187215 202210 193195 201201 236240

13 198198 184184 179197 275275 187215 212212 193195 201201 238238

13 194194 184184 195199 269275 187215 202206 195199 201201 238238

13 194196 188194 195197 269269 187215 212212 195195 201201 234236

13 194196 184184 195195 269275 187215 210212 193193 201201 236236

13 196196 182184 197197 269275 187215 206210 195197 201201 236236

13 196198 154178 195195 269269 187215 206214 195195 201201 234234

13 192196 164182 195195 269275 187215 206210 197197 201201 236238

13 196196 176182 195195 269275 187219 200212 195197 201201 240240

13 196196 176182 195195 269275 187215 194202 195195 201201 238238

14 196196 180192 195195 275275 187215 198204 195195 201201 238238

14 194196 178184 195197 275275 187215 200206 195197 205205 236238

14 196196 176186 193195 269275 187215 204218 195195 201201 238238

14 196196 180184 195195 269275 187215 238238 195195 201201 236236

14 196196 174174 195195 275275 187215 236236 193195 201201 238238

14 198198 184190 195195 269269 187215 200206 195195 201201 236236

14 196196 182184 195195 269275 187215 206216 195195 201205 238238

14 194196 176182 195195 269269 187215 200206 195195 201201 236236

14 194196 180186 195197 269275 187215 200202 195195 201201 234236

15 196196 184186 195195 269269 187215 216216 195195 201201 238238

15 192194 160176 195195 269275 187215 238238 197197 201201 234236

15 196196 180194 195195 269269 187215 196206 195195 201205 238240

15 196196 188188 195197 00 187215 204212 195197 201201 238238

15 196196 178192 195199 269275 187215 206216 195199 201201 236236

15 198198 178178 195195 00 187215 206210 195195 201209 238238

15 198198 176182 195195 269275 187215 230230 197197 201201 238238

15 196198 184188 195195 275275 187215 216216 195197 201201 236238

16 196196 176176 195195 269269 00 206210 193195 201201 238240

16 194196 176186 195197 269275 187215 204208 195197 201209 236238

16 196196 178186 195197 275275 187215 210210 197199 201201 240240

16 200200 154154 195195 00 00 198198 197199 201201 246246

16 194196 180182 199199 269275 187215 202212 195195 201201 238240

16 194196 178182 195197 269275 187215 200210 195197 201201 236238

16 196196 178182 193195 269269 187215 202208 195195 201201 236238

16 194194 176180 195195 269275 187215 208214 195195 201201 236238

16 196196 180180 193195 269275 00 204204 195195 201205 236238

16 200200 188188 195195 00 187219 190190 193195 201201 242242

16 196196 184186 199199 269275 187215 198204 195195 201201 240240

16 196196 180186 195195 269275 187219 198198 195195 201201 238238

16 196196 176186 195195 269269 187219 202212 193195 201205 238238

16 196196 184196 195197 00 187219 00 197197 201201 240240

16 194196 178178 193195 275279 187187 200214 195195 201201 236238

16 192196 186188 199199 275275 187219 200210 195195 201201 240240

16 196196 180180 195195 275275 187215 204220 195195 201201 238238

16 196196 186186 195197 269275 187215 206212 195197 201201 238238

16 196196 160188 195197 269269 187207 204208 195197 201201 238238

16 196196 178188 195195 269269 187215 194198 195195 201201 236238

16 194196 186200 197197 269269 187215 198200 195195 201201 236238

16 200200 188188 195195 00 215215 188188 195195 201201 242242

17 192198 180186 197197 269275 187215 200214 197197 201201 234240

17 196196 178184 195195 269269 187215 210210 195195 201201 238238

17 194196 174180 195195 269275 00 190202 193195 201201 236238

17 196196 186192 195197 275275 187215 200210 195197 201201 238238

17 194196 160186 195197 269269 187215 198198 195197 201201 236238

17 196196 178184 195201 269275 187215 200200 195201 201201 238238

17 192196 164178 195195 275275 00 204210 195195 201201 234238

17 194196 178178 195195 269275 187219 198210 195195 201201 236238

17 192196 174184 201201 00 00 190210 193193 201201 234234

17 196196 180190 195195 269275 187215 200212 193195 201201 238238

17 194196 182186 195197 269275 187215 190202 195197 201201 236238

17 194196 176182 195195 275275 187215 190198 193195 201201 236238

17 196196 178180 195195 275275 187215 00 195195 201201 238238

17 192196 180186 193195 269275 00 214208 195195 201201 238240

17 196196 180184 197197 275275 00 198202 195195 201201 238238

18 194194 180186 195197 271271 187215 204206 196198 197197 23423418 194194 186188 195195 275275 187215 194212 194194 197197 23423418 192194 186186 195195 269269 187215 190208 194194 197201 23223418 194194 184188 195197 269275 187215 194206 194196 197197 23423418 194194 178182 195195 269275 187215 206206 194194 197197 23423418 194194 182186 195197 269269 187215 190212 194196 197197 23423418 194198 182182 195197 00 00 00 194194 00 0018 194194 184186 00 00 00 00 194194 197197 0018 192194 182184 195195 00 00 212212 194194 197197 23223418 198198 180182 195195 00 00 194194 00 197201 0018 00 182186 195195 00 00 00 00 00 0018 194194 178190 195199 00 00 210210 194198 197197 234234
